# Supplementary material for: A Community Perspective on Bowel Management and Quality of Life after Spinal Cord Injury: The Influence of Autonomic Dysreflexia
Source: PubMed Central journal article supplement — J Neurotrauma. 2018 May 1;35(9):1091–105. doi: 10.1089/neu.2017.5343 (PMC5908418; doi:10.1089/neu.2017.5343), 2018-05-01
Supplement: Supp_Data.pdf [file Supp_Data.pdf]

## Cover page for paper-based questionnaire

### Bowel care and cardiovascular function after spinal cord injury

**Introduction and Purpose:** You are invited to participate in a survey about bowel care and cardiovascular function after spinal cord injury (SCI) by Dr. Victoria Claydon, and her student Jessica Inskip, from Simon Fraser University, Burnaby, BC, Canada.

Bowel care has been identified as a key aspect for improving quality of life for individuals living with SCI. However, it has become clear that we do not know very much about current bowel care practices. We are hoping to gather more details about individuals' current bowel care practices and their cardiovascular responses to bowel care.

Individuals living with SCI everyday are the experts in this area. Your contribution to this research may help inform future individuals who sustain a SCI by describing practices currently used by individuals living with SCI. For example, it will help provide clearer explanations of bowel care practices for information manuals. Finally, it will also help to direct future research and improvements in care.

**Voluntary:** Your participation in the survey is completely voluntary and you are under no obligation to participate. There will be no consequence for you if you are not interested in taking part in the survey.

If you do not want to answer some of the questions you are free to skip them and complete what you feel comfortable with. If you complete the survey this will mean that you have consented to participate in this project and that the research team is able to include your responses to the survey questions in the data collection.

**Confidentiality:** These surveys will be anonymous in nature. There will be no identifying information (i.e. date of birth, name) collected from participants. All data collected will be stored securely in Dr. Claydon's research office, and only research staff will have access to this information. If you have any questions or concerns, you can contact Dr. Victoria Claydon at [victoria\\_claydon@sfu.ca](mailto:victoria_claydon@sfu.ca) or by phone at 1-778-858-8118; or Hal Weinberg, Director of the Office of Research Ethics at Simon Fraser University (E-mail: [hal\\_weinberg@sfu.ca](mailto:hal_weinberg@sfu.ca); phone: 1-778-7782-6593).

Copies of the results can be obtained by contacting the investigators at the number above or in writing to Jessica Inskip at [jinskip@sfu.ca](mailto:jinskip@sfu.ca).

**Before completing the survey:** I have read the information about this study and would like to complete the survey now. By completing and returning the survey, I am confirming that I **have a spinal cord injury and am over the age of 18.**

## Cover page for online questionnaire

### Bowel care and cardiovascular function after spinal cord injury

**Introduction and Purpose:** You are invited to participate in a survey about bowel care and cardiovascular function after spinal cord injury (SCI) by Dr. Victoria Claydon, and her student Jessica Inskip, from Simon Fraser University, Burnaby, BC, Canada.

Bowel care has been identified as a key aspect for improving quality of life for individuals living with SCI. However, it has become clear that we do not know very much about current bowel care practices. We are hoping to gather more details about individuals' current bowel care practices and their cardiovascular responses to bowel care.

Individuals living with SCI everyday are the experts in this area. Your contribution to this research may help inform future individuals who sustain a SCI by describing practices currently used by individuals living with SCI. For example, it will help provide clearer explanations of bowel care practices for information manuals. Finally, it will also help to direct future research and improvements in care.

**Voluntary:** Your participation in the survey is completely voluntary and you are under no obligation to participate. There will be no consequence for you if you are not interested in taking part in the survey.

If you do not want to answer some of the questions you are free to skip them and complete what you feel comfortable with. If you complete the survey this will mean that you have consented to participate in this project and that the research team is able to include your responses to the survey questions in the data collection.

**Confidentiality:** These surveys will be anonymous in nature. There will be no identifying information (i.e. date of birth, name) collected from participants. All data collected will be stored securely in Dr. Claydon's research office, and only research staff will have access to this information. If you have any questions or concerns, you can contact Dr. Victoria Claydon at [victoria\\_claydon@sfu.ca](mailto:victoria_claydon@sfu.ca) or by phone at 1-778-858-8118; or Hal Weinberg, Director of the Office of Research Ethics at Simon Fraser University (E-mail: [hal\\_weinberg@sfu.ca](mailto:hal_weinberg@sfu.ca); phone: 1-778-7782-6593).

Copies of the results can be obtained by contacting the investigators at the number above or in writing to Jessica Inskip at [jinskip@sfu.ca](mailto:jinskip@sfu.ca).

**Before completing the survey:** I have read the information about this study and would like to complete the survey now. By clicking on the "Next" button below, I am confirming that I **have a spinal cord injury and am over the age of 18**. If I start the survey and decide I don't want to finish it I can exit the survey at any time.

## BOWEL CARE AND CARDIOVASCULAR FUNCTION AFTER SPINAL CORD INJURY

Identification Number \_\_\_\_\_ Date completed DD/MM/YYYY

Date of Birth DD/MM/YYYY Date of Injury DD/MM/YYYY

### PATIENT INFORMATION/DEMOGRAPHICS

1. What site on your spinal cord is injured?

\_\_\_\_\_

2. Can you feel touch in your anal area?

Yes       No

3. Can you voluntarily tighten your anal sphincter?

Yes       No

4. Can you feel light touch below your lesion level?

Yes       No

5. Can you feel the difference between sharp and dull below your lesion level?

Yes       No

6. Can you lift your legs against gravity?

Yes       No

7. Can you walk without braces, other assistive devices, or people?

Yes       No

8. What assistive devices do you use most often in your daily life?

- None
- Cane
- Crutches
- Manual wheelchair
- Motorized wheelchair
- Other. Please specify: \_\_\_\_\_

### BOWEL CARE QUESTIONS

9. Are you satisfied with your bowel management routine?

- Yes, very satisfied
- Yes, satisfied
- No, dissatisfied
- No, very dissatisfied

**10. What steps do you use to empty your bowel? Check all that you use:**

|                                          | Main                     | Supplementary            |
|------------------------------------------|--------------------------|--------------------------|
| Normal defecation/straining/bearing down | <input type="checkbox"/> | <input type="checkbox"/> |
| Drink/food before bowel management       | <input type="checkbox"/> | <input type="checkbox"/> |
| Massaging or rubbing abdomen             | <input type="checkbox"/> | <input type="checkbox"/> |
| Touching the skin around the anus        | <input type="checkbox"/> | <input type="checkbox"/> |
| Digital stimulation                      | <input type="checkbox"/> | <input type="checkbox"/> |
| Manual evacuation                        | <input type="checkbox"/> | <input type="checkbox"/> |
| Suppositories                            | <input type="checkbox"/> | <input type="checkbox"/> |
| Laxatives                                | <input type="checkbox"/> | <input type="checkbox"/> |
| Enemas                                   | <input type="checkbox"/> | <input type="checkbox"/> |
| Stool softeners                          | <input type="checkbox"/> | <input type="checkbox"/> |
| Other, please specify;                   | <input type="checkbox"/> | <input type="checkbox"/> |

**11. How long have you been managing your bowel routine this way?**

- Less than 6 months
- Less than one year (between 6 months and 1 year)
- Up to 5 years (between 1 year and 5 years)
- Longer than 5 years

**12. Do you currently use lidocaine lubricant (an anesthetic, also called Xylocaine) as part of your bowel care management routine?**

- No, never
- Yes, sometimes
- Yes, always
- I don't know

**13. How often do you perform your bowel care?**

- Three times or more per day
- Twice daily
- Once daily
- Not daily but more than twice every week
- Twice every week
- Once every week
- Less than once every week, but at least once within the last four weeks

**14. How are you normally positioned during your bowel care?**

- Sitting on toilet chair/commode
- Sitting on a raised toilet seat
- Lying in Bed
- Other, please specify: \_\_\_\_\_

**15. How much do you usually drink each day?**

- ½ litre (about ½ quart)
- 1 litre (about 1 quart)
- 1-2 litres
- More than 2 litres

**16. Do you take any other medications that might affect bowel function?**

- No
- Not sure
- Yes, anticholinergics (Ditropan/LyrirelXL Vesicare, Detrol, Toviaz)
- Yes, opiates (methadone, codeine, etc.)
- Yes, antidepressants (Tricyclics: Elavil, Amitriptyline, Nortipyline, Desipramine)
- Yes, other. Please specify: \_\_\_\_\_

**17. Do you regulate your diet to help with bowel management? (For example, by taking fiber supplements or eating certain fiber-rich foods?)**

- No
- Yes. Please explain: \_\_\_\_\_

**18. Do you require assistance to perform your bowel care?**

- Required total assistance
- Required partial assistance; did not clean self
- Required partial assistance; cleaned self independently
- Performed care routine independently in all tasks but needed adaptive devices or special setting (e.g., bars)
- Performed care routine independently; did not need adaptive devices or special setting

**19. What is the average time that you require for bowel care?**

- 0-5 min
- 6-10 min
- 11-20 min
- 21-30 min
- 31-60 min
- 61-90 min
- More than 90 min
- Unknown

**20. Breaking down the events and intervals of defecation:****a. Average time from initiation of bowel care to the time that stool comes out:**

- Minutes: \_\_\_\_\_
- Not Applicable
- Unknown

**b. Average time during bowel care movement that stool intermittently or continuously comes out with or without assistance:**

- Minutes: \_\_\_\_\_
- Not Applicable
- Unknown

**c. Average time spent waiting after last stool passes before ending bowel care:**

- Minutes: \_\_\_\_\_
- Not Applicable
- Unknown

**21. At what time do you usually do your bowel care?**

- Morning
- Evening
- Other: \_\_\_\_\_

**22. How flexible is your bowel management routine?**

- Very flexible – I often change the time or frequency at which I manage my bowels
- Quite flexible – I can delay management or alter the timing if I want to
- Not very flexible – I don't usually change my routine unless it's unavoidable
- Not flexible at all – I will not go to activities if they clash with my bowel management time

**23. Do you wear a pad or plug to manage bowel accidents?**

- Everyday
- Not every day but at least once per week
- Not every week but at least once per month
- Less than once per month
- Never

**24. How are you aware of the need to defecate?**

- Direct sensation
- Indirect sensation (e.g., abdominal cramping or discomfort, abdominal muscle spasm, spasm of lower extremities, perspiration, headache, chills)
- None
- Unknown

**25. How often do you experience pain during bowel care?**

- Daily
- Not every day but at least once per week
- Not every week but at least once per month
- Less than once per month
- Never
- Unknown

**26. How often do you experience abdominal bloating or discomfort (ANYTIME – not only during bowel care)?**

- Daily
- Not every day but at least once per week
- Not every week but at least once per month
- Less than once per month
- Never
- Unknown

**27. How often do you experience respiratory discomfort (shortness of breath/difficulty in taking a deep breath) due in part to a distended abdomen?**

- Daily
- Not every day but at least once per week
- Not every week but at least once per month
- Less than once per month
- Never
- Unknown

**28. If you had to estimate your frequency of fecal incontinence:**

- Two episodes or more per day
- Once daily
- Not every day but at least once per week
- Not every week but at least once per month
- Once per month
- Less than once per month
- Never
- Not applicable
- Unknown

**29. Does fecal incontinence alter your lifestyle?**

- Lifestyle altered each day
- Lifestyle altered at least once per week but not every day
- Lifestyle altered more than once per month but not every week
- Lifestyle altered once per month
- Lifestyle altered less than once per month
- Lifestyle not altered
- Not applicable
- Unknown

**30. What is the overall impact of bowel dysfunction on your quality of life?**

- Major impact
- Some impact
- Little impact
- No impact

**31. How does bowel management fit into your life? Please check one box beside each statement:**

|                                                           | Not at all               | A little                 | A lot                    |
|-----------------------------------------------------------|--------------------------|--------------------------|--------------------------|
| I fit my life around my bowel management                  | <input type="checkbox"/> | <input type="checkbox"/> | <input type="checkbox"/> |
| Bowel management stops me from working outside my home    | <input type="checkbox"/> | <input type="checkbox"/> | <input type="checkbox"/> |
| Managing my bowels interferes with personal relationships | <input type="checkbox"/> | <input type="checkbox"/> | <input type="checkbox"/> |
| Bowel management stops me staying away from home          | <input type="checkbox"/> | <input type="checkbox"/> | <input type="checkbox"/> |
| My bowel management is a problem to me                    | <input type="checkbox"/> | <input type="checkbox"/> | <input type="checkbox"/> |
| Bowel management interferes with my social life           | <input type="checkbox"/> | <input type="checkbox"/> | <input type="checkbox"/> |

**32. How much does bowel management affect your life compared to other aspects of spinal cord injury?**

Please give each of the following a score between 1 and 10, where 10 is the worst effect and 1 is the least.

- Managing my my bladder: \_\_\_\_\_  Does not apply
- Changes in my sexual function: \_\_\_\_\_  Does not apply
- Using a wheelchair: \_\_\_\_\_  Does not apply
- Taking care of my skin: \_\_\_\_\_  Does not apply
- Managing my bowel: \_\_\_\_\_  Does not apply
- Living with chronic pain: \_\_\_\_\_  Does not apply
- Living with spasticity: \_\_\_\_\_  Does not apply

**CARDIOVASCULAR QUESTIONS**

**33. During your bowel routine, do you ever experience any heart palpitations, irregular heartbeats or a feeling of “fluttering” in your chest?**

- Yes       No

**34. If yes, how often do you normally experience this?**

- Daily
- Weekly
- Monthly
- Rarely
- Never



**35. How would you rate the following symptoms during your normal bowel routine?**

|                                     | Not experienced          | Mild                     | Moderate                 | Severe                   | Very severe              |
|-------------------------------------|--------------------------|--------------------------|--------------------------|--------------------------|--------------------------|
| Headache                            | <input type="checkbox"/> |
| Dizziness                           | <input type="checkbox"/> |
| Nasal congestion                    | <input type="checkbox"/> |
| Goosebumps                          | <input type="checkbox"/> |
| Blurred vision/visual sensitivity   | <input type="checkbox"/> |
| Visual tunneling                    | <input type="checkbox"/> |
| Facial flushing                     | <input type="checkbox"/> |
| Profuse sweating                    | <input type="checkbox"/> |
| Difficulty breathing                | <input type="checkbox"/> |
| Spasticity                          | <input type="checkbox"/> |
| Nausea                              | <input type="checkbox"/> |
| Shortness of breath/chest tightness | <input type="checkbox"/> |
| Chest pain                          | <input type="checkbox"/> |
| Palpitation                         | <input type="checkbox"/> |
| Uncomfortably fast heart rate       | <input type="checkbox"/> |
| Uncomfortably slow heart rate       | <input type="checkbox"/> |
| General unwellness                  | <input type="checkbox"/> |
| Seizure                             | <input type="checkbox"/> |
| Pain                                | <input type="checkbox"/> |
| Other, please specify;              | <input type="checkbox"/> |

**AUTONOMIC DYSREFLEXIA QUESTIONS**

**Autonomic dysreflexia refers to increases in blood pressure that occur in response to a sensory stimulus below the level of spinal cord injury. The sensory stimulus may be something that would normally be expected to be painful (e.g., a bump) or non-painful (e.g., a full bladder). The stimulus does not need to be perceived to cause autonomic dysreflexia.**

**36. Have you ever experienced autonomic dysreflexia since your injury?**

- Yes
- No
- Don't know

**37. If yes, how many times?**

- Once only
- 1-3 times
- 4-7 times
- More than 8 times

**38. How often do you experience the following symptoms?**

|                                     | Daily                    | Weekly                   | Monthly                  | Rarely                   | Never                    |
|-------------------------------------|--------------------------|--------------------------|--------------------------|--------------------------|--------------------------|
| Headache                            | <input type="checkbox"/> |
| Dizziness                           | <input type="checkbox"/> |
| Nasal congestion                    | <input type="checkbox"/> |
| Goosebumps                          | <input type="checkbox"/> |
| Blurred vision/visual sensitivity   | <input type="checkbox"/> |
| Visual tunneling                    | <input type="checkbox"/> |
| Facial flushing                     | <input type="checkbox"/> |
| Profuse sweating                    | <input type="checkbox"/> |
| Difficulty breathing                | <input type="checkbox"/> |
| Spasticity                          | <input type="checkbox"/> |
| Nausea                              | <input type="checkbox"/> |
| Shortness of breath/chest tightness | <input type="checkbox"/> |
| Chest pain                          | <input type="checkbox"/> |
| Palpitation                         | <input type="checkbox"/> |
| Uncomfortably fast heart rate       | <input type="checkbox"/> |
| Uncomfortably slow heart rate       | <input type="checkbox"/> |
| General unwellness                  | <input type="checkbox"/> |
| Seizure                             | <input type="checkbox"/> |
| Pain                                | <input type="checkbox"/> |
| Other, please specify;              | <input type="checkbox"/> |

**39. What sorts of things trigger these symptoms?**

|                        | Yes                      | No                       | Not applicable           |
|------------------------|--------------------------|--------------------------|--------------------------|
| Bladder trigger        | <input type="checkbox"/> | <input type="checkbox"/> | <input type="checkbox"/> |
| Bowel trigger          | <input type="checkbox"/> | <input type="checkbox"/> | <input type="checkbox"/> |
| Sexual activity        | <input type="checkbox"/> | <input type="checkbox"/> | <input type="checkbox"/> |
| Pain                   | <input type="checkbox"/> | <input type="checkbox"/> | <input type="checkbox"/> |
| Pressure sores         | <input type="checkbox"/> | <input type="checkbox"/> | <input type="checkbox"/> |
| Spasticity             | <input type="checkbox"/> | <input type="checkbox"/> | <input type="checkbox"/> |
| Ingrown nails          | <input type="checkbox"/> | <input type="checkbox"/> | <input type="checkbox"/> |
| Fracture               | <input type="checkbox"/> | <input type="checkbox"/> | <input type="checkbox"/> |
| Tight clothes/devices  | <input type="checkbox"/> | <input type="checkbox"/> | <input type="checkbox"/> |
| Menstrual cramps       | <input type="checkbox"/> | <input type="checkbox"/> | <input type="checkbox"/> |
| High/low temperatures  | <input type="checkbox"/> | <input type="checkbox"/> | <input type="checkbox"/> |
| Blood clot             | <input type="checkbox"/> | <input type="checkbox"/> | <input type="checkbox"/> |
| Other, please specify; | <input type="checkbox"/> | <input type="checkbox"/> | <input type="checkbox"/> |

**40. Has autonomic dysreflexia every interfered with your ability to participate in the following activities?**

|                            | Yes                      | No                       | Not applicable           |
|----------------------------|--------------------------|--------------------------|--------------------------|
| Activities of daily living | <input type="checkbox"/> | <input type="checkbox"/> | <input type="checkbox"/> |
| Work                       | <input type="checkbox"/> | <input type="checkbox"/> | <input type="checkbox"/> |
| Exercise                   | <input type="checkbox"/> | <input type="checkbox"/> | <input type="checkbox"/> |
| Sexual activity            | <input type="checkbox"/> | <input type="checkbox"/> | <input type="checkbox"/> |
| Rehabilitation             | <input type="checkbox"/> | <input type="checkbox"/> | <input type="checkbox"/> |
| Household chores           | <input type="checkbox"/> | <input type="checkbox"/> | <input type="checkbox"/> |
| Driving                    | <input type="checkbox"/> | <input type="checkbox"/> | <input type="checkbox"/> |
| Social activities          | <input type="checkbox"/> | <input type="checkbox"/> | <input type="checkbox"/> |
| Sleep                      | <input type="checkbox"/> | <input type="checkbox"/> | <input type="checkbox"/> |
| Other, please specify;     | <input type="checkbox"/> | <input type="checkbox"/> | <input type="checkbox"/> |

**41. Have you ever used autonomic dysreflexia to boost your sports performance?**

- Yes
- No
- Not applicable
- Prefer not to answer

**ORTHOSTATIC HYPOTENSION QUESTIONS**

**42. Have you ever fainted prior to your injury?**

- Yes
- No
- Don't know

**43. If yes, how many times?**

- Once only
- 1-3 times
- 4-7 times
- More than 8 times

**44. Have you ever fainted since your injury?**

- Yes
- No
- Don't know

**45. If yes, how many times?**

- Once only
- 1-3 times
- 4-7 times
- More than 8 times

**46. How often do you experience the following symptoms WHEN UPRIGHT  
(and NOT while experiencing autonomic dysreflexia)?**

|                               | Daily                    | Weekly                   | Monthly                  | Rarely                   | Never                    |
|-------------------------------|--------------------------|--------------------------|--------------------------|--------------------------|--------------------------|
| Dizziness                     | <input type="checkbox"/> |
| Fainting/Blackouts            | <input type="checkbox"/> |
| Lightheadedness               | <input type="checkbox"/> |
| Blurred vision                | <input type="checkbox"/> |
| Visual tunneling              | <input type="checkbox"/> |
| Profuse sweating              | <input type="checkbox"/> |
| Profound tiredness/lethargy   | <input type="checkbox"/> |
| Spasticity                    | <input type="checkbox"/> |
| Nausea                        | <input type="checkbox"/> |
| Shortness of breath           | <input type="checkbox"/> |
| Palpitations                  | <input type="checkbox"/> |
| Uncomfortable fast heart rate | <input type="checkbox"/> |
| Uncomfortable slow heart rate | <input type="checkbox"/> |
| Extreme pallor                | <input type="checkbox"/> |
| Seizure                       | <input type="checkbox"/> |
| Other, please specify;        | <input type="checkbox"/> |

**47. What sorts of things trigger these symptoms?**

|                                | Yes                      | No                       | Not applicable           |
|--------------------------------|--------------------------|--------------------------|--------------------------|
| Bladder trigger                | <input type="checkbox"/> | <input type="checkbox"/> | <input type="checkbox"/> |
| Postural change in the morning | <input type="checkbox"/> | <input type="checkbox"/> | <input type="checkbox"/> |
| Sitting still in a wheelchair  | <input type="checkbox"/> | <input type="checkbox"/> | <input type="checkbox"/> |
| Being in a warm room           | <input type="checkbox"/> | <input type="checkbox"/> | <input type="checkbox"/> |
| Drinking alcohol               | <input type="checkbox"/> | <input type="checkbox"/> | <input type="checkbox"/> |
| Stopping exercise              | <input type="checkbox"/> | <input type="checkbox"/> | <input type="checkbox"/> |
| After meals                    | <input type="checkbox"/> | <input type="checkbox"/> | <input type="checkbox"/> |
| After bathing                  | <input type="checkbox"/> | <input type="checkbox"/> | <input type="checkbox"/> |
| Blood sampling/ sight of blood | <input type="checkbox"/> | <input type="checkbox"/> | <input type="checkbox"/> |
| Physiotherapy                  | <input type="checkbox"/> | <input type="checkbox"/> | <input type="checkbox"/> |
| Other, please specify;         | <input type="checkbox"/> | <input type="checkbox"/> | <input type="checkbox"/> |

**48. Has orthostatic hypotension interfered with your ability to participate in the following activities?**

|                            | Yes                      | No                       | Not applicable           |
|----------------------------|--------------------------|--------------------------|--------------------------|
| Activities of daily living | <input type="checkbox"/> | <input type="checkbox"/> | <input type="checkbox"/> |
| Work                       | <input type="checkbox"/> | <input type="checkbox"/> | <input type="checkbox"/> |
| Exercise                   | <input type="checkbox"/> | <input type="checkbox"/> | <input type="checkbox"/> |
| Sexual activity            | <input type="checkbox"/> | <input type="checkbox"/> | <input type="checkbox"/> |
| Rehabilitation             | <input type="checkbox"/> | <input type="checkbox"/> | <input type="checkbox"/> |
| Household chores           | <input type="checkbox"/> | <input type="checkbox"/> | <input type="checkbox"/> |
| Driving                    | <input type="checkbox"/> | <input type="checkbox"/> | <input type="checkbox"/> |
| Social activities          | <input type="checkbox"/> | <input type="checkbox"/> | <input type="checkbox"/> |
| Sleep                      | <input type="checkbox"/> | <input type="checkbox"/> | <input type="checkbox"/> |
| Other, please specify;     | <input type="checkbox"/> | <input type="checkbox"/> | <input type="checkbox"/> |

**49. Place an “x” on each of the following lines to indicate how you are feeling RIGHT NOW.**

I am feeling:

Not at all \_\_\_\_\_ Extremely fatigued  
fatigued

Not at all \_\_\_\_\_ Extremely tired  
tired

Not at all \_\_\_\_\_ Extremely exhausted  
exhausted

**50. What is your fluid intake each day?**

- About 500mL (about ½ quart)
- 1 litre (about 1 quart or 34oz.)
- 1-2 litres
- More than 2 litres

**51. How much caffeine do you usually drink each day, on average?**

(including coffee, tea, soda)

- None
- 1 cup/can
- 2 cups/cans
- 3 cups/cans
- 4 cups/cans
- 5 or more cups/cans

**52. How much alcohol do you usually drink each day, on average?**

(1 unit = 12oz (350mL) beer, 5oz (150mL) wine, 1.5oz (44mL) liquor)

- None
- 1 unit
- 2 units
- 3 units
- 4 or more units

**53. If you had to estimate your average daily urine output (24 hours), would it be:**

- <1000mL
- 1000mL
- 2000mL
- 3000mL
- 4000mL
- 5000mL or more

**54. Do you ever restrict your fluid intake because of bladder control problems or concerns?**

- No
- Yes, but rarely
- Yes, sometimes
- Yes, often

**55. Do you take any diuretics as part of your medications? Diuretics are sometimes called water pills as they increase the amount of urine that you produce (e.g., Lasix, HTCZ, etc.).**

- No
- Yes
- Not sure

**Thank you very much for taking the time to complete this questionnaire**
